# Supplementary material for: Cryptic Plutella species show deep divergence despite the capacity to hybridize
Source: PubMed Central journal article supplement (PMC5975261; doi:10.1186/s12862-018-1183-4), 2018-05-29
Supplement: 12862_2018_1183_MOESM1_ESM.pdf [file 12862_2018_1183_MOESM1_ESM.pdf]

## Additional File 1

Table S1: The four variable nucleotide sites among the five *P. xylostella* 613 bp COI haplotypes identified in 102 individuals from Australia. Shown are sequences from this study and re-analysed sequences from Landry and Hebert [1] downloaded from [dx.doi.org//10.5883//DS-PLUT1](https://dx.doi.org/10.5883//DS-PLUT1). Three haplotypes correspond to those reported by Saw et al. [2]: PxCOI01/PxMt01, GenBank accession: DQ394347; PxCOI02/PxMt06, GenBank accession: DQ394352; PxCOI04/PxMt02, GenBank accession: DQ394348. Nucleotide positions were determined from sequence MF151841. Only positions that differ from haplotype PxCOI01 are shown.

| Haplotype | Nucleotide position |     |     |     | No. individuals | Sequence reference |
|-----------|---------------------|-----|-----|-----|-----------------|--------------------|
|           | 343                 | 373 | 541 | 598 |                 |                    |
| PxCOI01   | T                   | A   | A   | A   | 76              | MF151841           |
| PxCOI02   | C                   | .   | .   | .   | 1               | PHSAU1068-12       |
| PxCOI03   | .                   | G   | .   | .   | 1               | LOQTC311-07        |
| PxCOI04   | .                   | .   | G   | .   | 23              | MF151838           |
| PxCOI05   | .                   | .   | .   | G   | 1               | PHLCD068-12        |

Table S2: The eight variable nucleotide sites among the nine *P. australiana* 613 bp COI haplotypes identified in 87 individuals from Australia. Haplotypes PaCOI01 and PaCOI02 were identified among sequences from this study and Landry and Hebert [1], and PaCOI04, PaCOI05, PaCOI08 and PaCOI09 were identified from Landry and Hebert [1]. Nucleotide positions were determined from sequence MF151865. Only the positions that differ from haplotype PaCOI01 are shown.

| Haplotype | Nucleotide position |     |     |     |     |     |     |     | No. individuals | Sequence reference |
|-----------|---------------------|-----|-----|-----|-----|-----|-----|-----|-----------------|--------------------|
|           | 202                 | 278 | 316 | 382 | 400 | 433 | 481 | 519 |                 |                    |
| PaCOI01   | T                   | T   | A   | C   | C   | A   | G   | G   | 74              | MF151865           |
| PaCOI02   | C                   | .   | .   | .   | .   | .   | .   | .   | 6               | MF151831           |
| PaCOI03   | C                   | .   | .   | .   | .   | .   | A   | .   | 1               | MF151885           |
| PaCOI04   | C                   | .   | .   | .   | .   | .   | .   | A   | 1               | MCCAA2949-12       |
| PaCOI05   | .                   | C   | .   | .   | .   | .   | .   | .   | 1               | PHLCA920-11        |
| PaCOI06   | .                   | .   | G   | .   | .   | .   | .   | .   | 1               | MF151836           |
| PaCOI07   | .                   | .   | .   | A   | .   | .   | .   | .   | 1               | MF151883           |
| PaCOI08   | .                   | .   | .   | .   | T   | .   | .   | .   | 1               | LSM1299-11         |
| PaCOI09   | .                   | .   | .   | .   | .   | G   | .   | .   | 1               | LNSWA731-05        |

Table S3: Log-logistic regression statistics for dose-response bioassays on *P. australiana* (*P. aus*) and *P. xylostella* (*P. x*) field strains and the *P. xylostella* (S) laboratory reference strain exposed to four commercial insecticides.

| Product     | Strain          | $n$ | Slope (SE)    | $LC_{50}$ (95% CL)<br>[mg L <sup>-1</sup> a.i.] | $RR_{LC50}$ | $LC_{99}$ (95% CL)<br>[mg L <sup>-1</sup> a.i.] | $RR_{LC99}$ |
|-------------|-----------------|-----|---------------|-------------------------------------------------|-------------|-------------------------------------------------|-------------|
| Coragen     | <i>P. aus</i>   | 320 | 2.016 ± 0.236 | 0.028 (0.023–0.034)                             | 0.45        | 0.276 (0.161–0.474)                             | 0.22        |
|             | <i>P. x</i>     | 322 | 1.363 ± 0.149 | 0.524 (0.411–0.667)                             | 8.26        | 15.235 (7.374–31.479)                           | 11.88       |
|             | <i>P. x</i> (S) | 323 | 1.528 ± 0.165 | 0.063 (0.051–0.079)                             | 1.00        | 1.282 (0.666–2.47)                              | 1.00        |
| Dominex     | <i>P. aus</i>   | 320 | 1.078 ± 0.117 | 0.032 (0.024–0.042)                             | 0.13        | 2.267 (0.92–5.583)                              | 0.16        |
|             | <i>P. x</i>     | 320 | 1.292 ± 0.146 | 9.792 (7.563–12.679)                            | 41.38       | 343.317 (158.25–744.816)                        | 24.85       |
|             | <i>P. x</i> (S) | 320 | 1.130 ± 0.118 | 0.237 (0.182–0.308)                             | 1.00        | 13.815 (5.685–33.574)                           | 1.00        |
| Proclaim    | <i>P. aus</i>   | 320 | 2.073 ± 0.235 | 0.012 (0.01–0.015)                              | 0.68        | 0.111 (0.066–0.186)                             | 0.39        |
|             | <i>P. x</i>     | 320 | 1.254 ± 0.146 | 0.073 (0.056–0.096)                             | 4.15        | 2.868 (1.282–6.415)                             | 10.04       |
|             | <i>P. x</i> (S) | 320 | 1.652 ± 0.181 | 0.018 (0.014–0.022)                             | 1.00        | 0.286 (0.153–0.532)                             | 1.00        |
| Success Neo | <i>P. aus</i>   | 320 | 2.087 ± 0.293 | 0.011 (0.009–0.014)                             | 0.14        | 0.101 (0.056–0.184)                             | 0.14        |
|             | <i>P. x</i>     | 320 | 1.766 ± 0.196 | 0.242 (0.197–0.297)                             | 2.94        | 3.266 (1.805–5.912)                             | 4.65        |
|             | <i>P. x</i> (S) | 321 | 2.143 ± 0.255 | 0.082 (0.068–0.099)                             | 1.00        | 0.703 (0.417–1.184)                             | 1.00        |

$n$ , number of insects tested;  $LC_{50}$ , dose predicted to cause 50% mortality with 95% confidence limits;  $LC_{99}$ , dose predicted to cause 99% mortality with 95% confidence limits;  $RR_{LC50}$ , resistance ratio at the  $LC_{50}$  dose level;  $RR_{LC99}$ , resistance ratio at the  $LC_{99}$  dose level.

## References

- [1] Landry JF, Hebert PDN. *Plutella australiana* (Lepidoptera, Plutellidae), an overlooked diamondback moth revealed by DNA barcodes. *ZooKeys*. 2013;(327):43–63.
- [2] Saw J, Endersby NM, McKechnie SW. Low mtDNA diversity among widespread Australian diamondback moth *Plutella xylostella* (L.) suggests isolation and a founder effect. *Insect Sci*. 2006;13(5):365–373.
